# Supplementary material for: Prevalence of Sub-clinical Mastitis and Associated Risk Factors at Cow Level in Dairy Farms in Southwestern Part of Bangladesh
Source: Preprints.org preprint supplement (doi:10.20944/preprints202007.0679.v1), 2020-07-28
Supplement: Supplementary file 1 [file Table S1.docx]

Table S1: Prevalence of sub clinical mastitis in geographically in Jhenaidah district.

| **Level** | **Upazilla** | **N** | **Frequency (%)** | **95% Confidence Interval** |
| --- | --- | --- | --- | --- |
| Quarter | Jhenaidah sadar | 100 | 42 (42.0) | 32.2-52.3 |
| Harinakunda | 96 | 21 (21.9) | 14.1-31.5 |
| Kotchadpur | 116 | 29 (25.0) | 17.4-33.9 |
| Individual | Jhenaidah sadar | 25 | 17 (68.0) | 46.5-85.0 |
| Harinakunda | 23 | 14 (60.9) | 38.5-80.2 |
| Kotchadpur | 30 | 22 (73.3) | 54.1-87.7 |
| Farm | Jhenaidah sadar | 10 | 9 (90.0) | 55.5-99.7 |
| Harinakunda | 10 | 6 (60.0) | 26.2-87.8 |
| Kotchadpur | 12 | 10 (83.3) | 51.6-97.9 |
