# Supplementary material for: Prevalence of Sub-clinical Mastitis and Associated Risk Factors at Cow Level in Dairy Farms in Southwestern Part of Bangladesh
Source: Preprints.org preprint supplement (doi:10.20944/preprints202007.0679.v1), 2020-07-28
Supplement: Supplementary file 3 [file Table S2.docx]

Table S2: Univariable association between cow level potential risk factors and SFT score

| **Variable** | **Category** | **Animal Level** | | **Quarter Level** | |
| --- | --- | --- | --- | --- | --- |
| **Positive (%)** | **P-value** | **Positive (%)** | **P-value** |
| Breed | HF× Sahiwal | 5 (38.5) | 0.01 | 9 (17.3) | 0.04 |
| HF × Local | 48 (73.9) | 83 (31.9) |
| Body Condition Score (BCS) | ≥3 | 39 (78.0) | 0.01 | 71 (35.5) | <0.01 |
| 2 | 14 (50.0) | 21 (18.8) |
| Udder Shape | Bowl and Cup | 9 (81.8) | 0.54 | 18 (40.9) | 0.07 |
| Tight | 37 (64.9) | 59 (25.9) |
| Pendulous | 7 (70.0) | 15 (37.5) |
| Teat Shape | Cylindrical | 9 (75.0) | 0.38 | 17 (35.4) | 0.41 |
| Flat | 1 (33.3) | 2 (16.7) |
| Pointed and round | 43 (68.3) | 73 (28.9) |
| Parity | 1-3 | 43 (64.2) | 0.08 | 76 (28.4) | 0.28 |
| 4-6 | 10 (90.9) | 16 (36.4) |
| Frequency of milking | Once in a day | 7 (36.8) | <0.01 | 10 (13.2) | <0.01 |
| >Once | 46 (77.9) | 82 (34.8) |
| Lactation stage | Early | 20 (64.5) | 0.76 | 31 (25.0) | 0.36 |
| Mid | 12 (75.0) | 41 (33.1) |
| Late | 21 (67.7) | 20 (31.3) |
| Pregnancy | Pregnant | 38 (71.7) | 0.30 | 68 (32.1) | 0.14 |
| Non-pregnant | 15 (60.0) | 24 (24.0) |
| Previous history of mastitis | Yes | 30 (85.7) | <0.01 | 57 (40.7) | <0.01 |
| No | 23 (53.5) |  | 35 (20.4) |
